# Supplementary material for: Solid phase extraction of carbamate pesticides with banana peel derived hierarchical porous carbon prior to high performance liquid chromatography
Source: Royal Society of Chemistry journal article supplement (doi:10.1039/c6ay02678h), 2016-12-14

## Supporting Information

### **Solid phase extraction of carbamate pesticides with banana peel derived hierarchical porous carbon prior to high performance liquid chromatography**

Menghua Li, Caina Jiao, Xiumin Yang, Chun Wang\*, Qiuhua Wu\*, and Zhi Wang

College of Science, Agricultural University of Hebei, Baoding 071001, Hebei, China.

Fig. S1 FTIR spectra of BHPC.

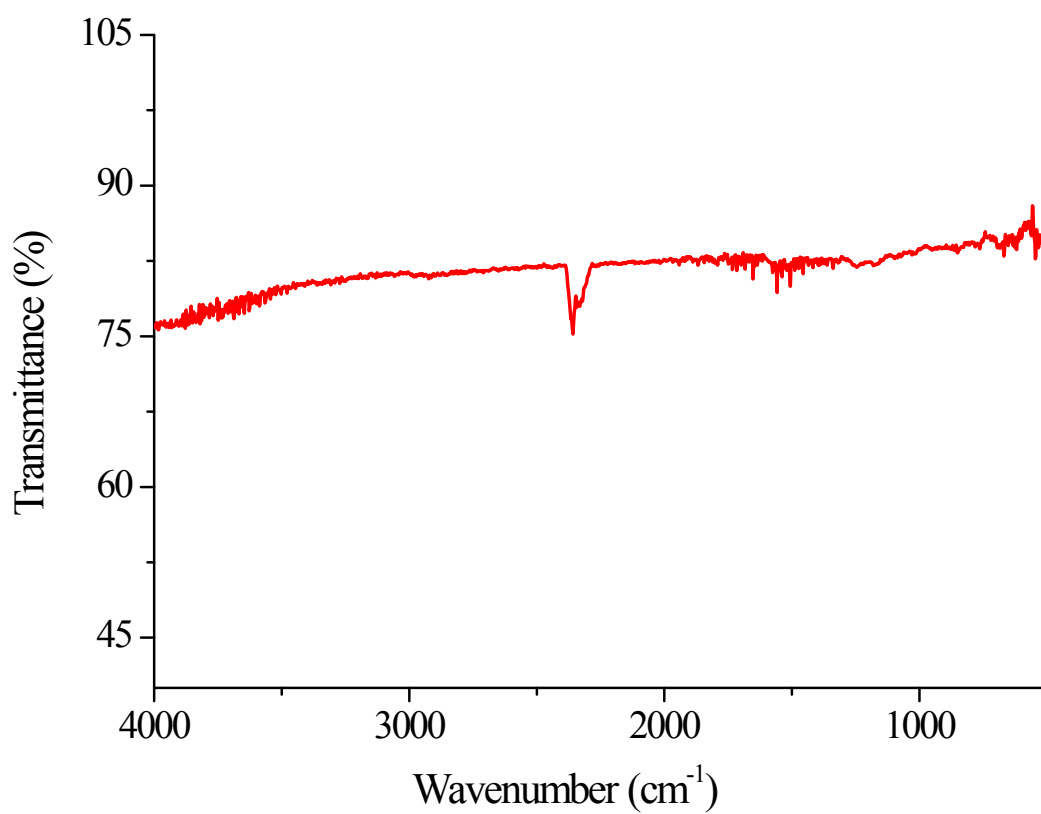

Supplement: c6ay02678h1.pdf [file c6ay02678h1.pdf]
